# Rapid Endotoxin-induced Alterations in Myocardial Calcium Handling

## Obligatory Role of Cardiac TNF- $\alpha$

Christof Stamm, M.D.,\* Douglas B. Cowan, Ph.D.,† Ingeborg Friehs, M.D.,‡ Sabrena Noria, Ph.D.,§  
Pedro J. del Nido, M.D.,|| Francis X. McGowan, Jr., M.D.¶

**Background:** Bacterial endotoxin (lipopolysaccharide [LPS]) induces septic shock and depressed myocardial contractility. The mechanism of LPS-mediated cardiac dysfunction remains controversial. We hypothesized that LPS exerts significant effects on myocardial excitation-contraction coupling by rapid stimulation of tumor necrosis factor  $\alpha$  (TNF- $\alpha$ ) expression in the heart.

**Methods:** Isolated rat hearts were studied with and without recirculation of cell-free perfusate. The effects of LPS, exogenous TNF- $\alpha$ , anti-TNF- $\alpha$  antibody, and ceramidase inhibition were examined. Measurements included myocardial uptake of LPS, left ventricular contractility, myocardial oxygen consumption, intracellular calcium [ $\text{Ca}^{2+}$ ]<sub>i</sub> cycling, and TNF- $\alpha$  concentrations in coronary perfusate and myocardium.

**Results:** Lipopolysaccharide was rapidly taken up by the perfused heart. With non-recirculating perfusion, LPS had no effect on contractility, oxygen consumption, coronary vascular resistance, or intracellular free calcium concentration ([ $\text{Ca}^{2+}$ ]<sub>i</sub>). However, with recirculating perfusion contractility was significantly impaired after 30 min of LPS, associated with lower [ $\text{Ca}^{2+}$ ]<sub>i</sub> levels and attenuated systolic rise in [ $\text{Ca}^{2+}$ ]<sub>i</sub>. Significant amounts of TNF- $\alpha$  accumulated in recirculating perfusate and myocardial tissue from LPS-perfused hearts. Ceramidase inhibition or neutralizing anti-TNF- $\alpha$  antibody inhibited the effects of LPS on contractility and [ $\text{Ca}^{2+}$ ]<sub>i</sub>. Recombinant rat TNF- $\alpha$  mimicked the LPS effects with faster onset.

**Conclusions:** Lipopolysaccharide exerts rapid, negative inotropic effects on the isolated whole rat heart. The reduction in contractility is associated with depressed intracellular calcium cycling. In response to LPS, TNF- $\alpha$  is rapidly released from the heart and mediates the effects of LPS via the sphingomyelinase pathway. The present study for the first time directly links

LPS-stimulated TNF- $\alpha$  production, abnormal calcium cycling, and decreased contractility in intact hearts.

DESPITE numerous advances in medical treatment, the mortality of sepsis continues to exceed 40%.<sup>1</sup> Bacterial endotoxin (lipopolysaccharide [LPS]) can trigger the systemic inflammatory response in Gram-negative sepsis, eventually resulting in dysfunction and failure of multiple organ systems. In addition to systemic vasodilation and arterial hypotension, decreased myocardial contractility with reduced contractile reserve is observed both clinically and experimentally and is an important factor in patient outcome.<sup>2-5</sup> Inflammatory cytokines such as tumor necrosis factor  $\alpha$  (TNF- $\alpha$ ) have been identified as mediators of cardiac depression during clinical sepsis<sup>6</sup> and in experimental models.<sup>7-10</sup> However, a direct effect of LPS on the heart has also been suggested.<sup>11-14</sup>

It is generally believed that the primary sources of the proinflammatory cytokines affecting the heart during sepsis are resident and circulating immune cells. However, it has recently been established that the cardiomyocyte is able to express TNF- $\alpha$  and other inflammatory mediators in response to LPS and during myocardial ischemia/reperfusion.<sup>7,8,15,16</sup> TNF- $\alpha$  appears to depress myocardial contractility in a biphasic manner. Immediate negative inotropic effects have been observed in cultured cardiomyocytes, myofibrillar preparations, and isolated whole heart.<sup>17-20</sup> Later effects, observed with a latency of several hours in isolated myocytes and *in vivo*, are mediated in part by nitric oxide (NO).<sup>12,21,22</sup> In addition, early and late NO-independent effects on various cellular functions have also been reported.<sup>23,24</sup>

Much of the available information regarding LPS and TNF effects on myocardial excitation-contraction coupling is from experiments performed in isolated myocytes or myofibrillar preparations. Despite these reports, there is no information about the relation between LPS uptake, TNF- $\alpha$  expression, changes in contractility, and calcium homeostasis in intact hearts. These issues are important to understanding cardiac dysfunction during sepsis and cardiopulmonary bypass, two of the settings in which LPS and TNF are active. Therefore, we sought to examine (1) the immediate effects of LPS on contractility and intracellular calcium handling in the isolated perfused whole rat heart, (2) the role of myocardial TNF- $\alpha$  production in producing these changes, and (3) the effect of interfering with TNF signaling on LPS-in-

\* Research Fellow, Departments of Anesthesia and Cardiac Surgery and Anesthesiology/Critical Care Medicine Laboratory, Children's Hospital and Harvard Medical School. † Instructor, Department of Anesthesia and Anesthesiology/Critical Care Medicine Laboratory, Children's Hospital and Harvard Medical School. ‡ Research Fellow, Department of Cardiac Surgery, Children's Hospital and Harvard Medical School. § Postdoctoral Fellow, Department of Laboratory Medicine and Pathobiology, University of Toronto. || Associate Professor, Department of Cardiac Surgery, Children's Hospital and Harvard Medical School. ¶ Associate Professor, Department of Anesthesia and Anesthesiology/Critical Care Medicine Laboratory, Children's Hospital and Harvard Medical School.

Received from the Departments of Anesthesia and Cardiac Surgery and Anesthesiology/Critical Care Medicine Laboratory, Boston, Massachusetts, and the Department of Laboratory Medicine and Pathobiology, Toronto, Ontario, Canada. Submitted for publication March 12, 2001. Accepted for publication July 3, 2001. Supported in part by grant Nos. HL-52589 and HL-66186 (to Dr. McGowan) and grant No. HL-46207 (to Dr. del Nido) from the National Institutes of Health, Bethesda, Maryland; the Charles H. Hood Foundation, Boston, Massachusetts (to Dr. Cowan); Foundation for Anesthesia Education and Research/Stuart Pharmaceuticals, Rochester, Minnesota; a Young Investigator Award from the Children's Hospital Anesthesia Foundation, Boston, Massachusetts (to Dr. McGowan); and grant No. STA 497/2-1 from the German Research Foundation, Bonn, Germany (to Dr. Stamm).

Address reprint requests to Dr. McGowan: Children's Hospital Boston, Department of Anesthesiology, Cardiac Anesthesia Service, 300 Longwood Avenue, Boston, Massachusetts 02115. Address electronic mail to: Francis.McGowan@tch.harvard.edu. Individual article reprints may be purchased through the Journal Web site, www.anesthesiology.org.

duced myocardial dysfunction. We specifically tested the hypothesis that LPS is rapidly taken up by the perfused whole heart and exerts short-term effects on myocardial excitation-contraction coupling *via* rapid stimulation of TNF signaling.

## Materials and Methods

### *Animal Care*

All animals were given humane care in compliance with the "Principles of Laboratory Animal Care" formulated by the National Society for Medical Research and the "Guide for the Care and Use of Laboratory Animals" prepared by the National Academy of Sciences and published by the National Institutes of Health (NIH Publication No. 86-23, revised 1996). The experimental protocol was reviewed and approved by the Animal Care Committee at Children's Hospital, Boston (Boston, MA).

### *Isolated Heart Preparation*

Male Wistar rats (weight, 250–300 g) were euthanized by intravenous injection of 150 mg/kg ketamine, 2.5 mg/kg xylazine, and 500 U/kg heparin. Hearts were rapidly excised and placed in 4°C Krebs-Henseleit (K-H) buffer. After cannulation of the aorta, hearts were perfused retrograde in the Langendorff mode with modified K-H buffer (115 mM NaCl, 26 mM NaHCO<sub>3</sub>, 11 mM glucose, 1.8 mM MgSO<sub>4</sub>, 1.2 mM KH<sub>2</sub>PO<sub>4</sub>, 3.3 mM KCl, 1.25 mM CaCl<sub>2</sub>, and 10 U/l insulin) that had been equilibrated with a 95% O<sub>2</sub>–5% CO<sub>2</sub> gas mixture and passed through a 0.2- $\mu$ m glass fiber filter. The final buffer pH was 7.35–7.45, partial pressure of oxygen (P<sub>O<sub>2</sub></sub>) was 550–600 mmHg, and partial pressure of carbon dioxide (P<sub>CO<sub>2</sub></sub>) was 30–40 mmHg. To minimize LPS contamination, the Langendorff system was sterilized and detoxified using Etoxyclean detergent (Sigma Chemical Company, St. Louis, MO) followed by sterile acidic and basic washes before every experiment. Solutions and perfusion apparatus were tested for endotoxin contamination using the E-toxate *Limulus* amebocyte lysate detection kit (Sigma). The temperature of perfused hearts was maintained at 37°C and monitored with a thermistor placed in the right-side ventricular cavity. The vena cavae and pulmonary veins were sutured closed, and a fluid-filled latex balloon connected to a micromanometry catheter (Millar Instruments, Houston, TX) was placed in the left ventricle *via* the left atrium. The balloon was filled to achieve a left ventricular end-diastolic pressure of 5 mmHg using a calibrated syringe. Hearts that developed a systolic pressure less than 70 mmHg after stabilization were discarded. The atrioventricular node was crushed, and hearts were paced at 250 beats/min *via* epicardial electrodes sutured to the right ventricle. Constant flow perfusion at a rate of 10 ml/min was chosen to minimize the effects of changes in coronary vascular

resistance on myocardial function. Coronary perfusion pressure was monitored throughout the experiment with a pressure transducer connected *via* a side port to the aortic perfusion cannula. Myocardial oxygen consumption was determined by obtaining samples of aortic perfusate and coronary effluent and derived from the arteriovenous difference in oxygen content (Stat Profile Plus 9; Nova Biochemical, Waltham, MA), multiplied by coronary flow and normalized to dry heart weight.

### *Effects of LPS*

To determine the contribution of substances released from the myocardium in response to LPS, experiments were performed both with and without perfusate recirculation. After 20-min stabilization in the Langendorff perfusion mode, baseline measurements were obtained. Five micrograms per milliliter LPS from *Salmonella typhosa* (Sigma) was added to the perfusate, and measurements performed every 5 min. In a separate set of experiments, perfusate recirculation was started after LPS was added with a total volume of 100 ml K-H buffer under continued filtration and oxygenation. This recirculation volume was chosen based on pilot experiments (approximately 8 recirculations occurred in 60 min) and did not compromise contractile function, calcium cycling, or oxygen consumption in control hearts.

### *Myocardial LPS Uptake*

To estimate the time-course of myocardial LPS uptake in the isolated whole heart, a separate set of hearts was perfused with LPS from *S. typhosa* that had been fluorescently labeled with Texas Red (Molecular Probes, Eugene, OR).<sup>25</sup> Briefly, the succinimidyl ester of Texas Red X was conjugated to LPS using the Fluoreporter Amine Labeling system (Molecular Probes) as described by the manufacturer. Labeled LPS was separated from unreacted fluorophore by gel filtration using 10 mM monobasic sodium phosphate buffer (pH 6.8) on a NAP 5 column (Pharmacia, Piscataway, NJ). The activity of Texas Red-labeled LPS was confirmed by the *Limulus* amebocyte lysate assay and its ability to stimulate TNF production in a macrophage cell line.

In these experiments, isolated hearts were perfused with K-H buffer containing 5  $\mu$ g/ml Texas Red-labeled LPS. Myocardial uptake of labeled LPS was determined in a modified spectrofluorometer (SLM-Aminco, Ithaca, NY) by using 524 nm excitation light and monitoring real-time emission light between 560 and 650 nm; LPS uptake was visualized as the increase in fluorescence over time measured at 589 nm (isosbestic point for myocardium).<sup>26</sup> To account for both background fluorescence and fluorescence from intravascular LPS, the fluorescence level after 2-min perfusion with Texas Red-labeled LPS was considered baseline and the data expressed as increase in fluorescence as compared with that baseline.

In separate experiments, 5- $\mu\text{m}$  sections of left ventricular myocardium from hearts that had been perfused with Texas Red X-LPS for 30 min, followed by a 30-min washout period, were fixed in 2% paraformaldehyde, paraffin embedded, and mounted for visualization on a BioRad MRC1024 confocal microscope (BioRad, Hercules, CA) fitted with a 60 $\times$  oil immersion objective. Half-micron-thick optical sections were merged and projected using the BioRad software; the laser excitation wavelength was 568 nm, and fluorescence emission was detected between 589 and 621 nm.

### *Inhibition of LPS Effects*

To test the hypothesis that LPS exerts its effects on the heart *via* TNF- $\alpha$  secreted from the myocardium, a specific antibody to TNF- $\alpha$  (goat anti-rat TNF- $\alpha$  immunoglobulin G; R&D Systems, Minneapolis, MN) was added to the perfusate to achieve a final concentration of 0.3  $\mu\text{g}/\text{ml}$ . This antibody was selected for its ability to neutralize the biologic activity of rat TNF- $\alpha$ . The neutralizing dose ( $\text{ND}_{50}$ ) for this lot was estimated to be 0.3  $\mu\text{g}/\text{ml}$  in the presence of 0.025 ng/ml recombinant rat TNF- $\alpha$ . Perfusion with anti-rat TNF- $\alpha$  alone was shown to have no effect on cardiac function (data not shown). The antibody was added to the perfusate simultaneously with LPS.

In other experiments, the contribution of TNF signaling to LPS effects was investigated using the cell-permeable ceramidase inhibitor N-oleylethanolamine (NOE; Sigma). Dissolved in ethanol, NOE was added at a concentration of 1  $\mu\text{M}$  to the perfusate 20 min before administration of LPS and given continuously throughout the experiment. At this concentration, NOE alone had no effect on function of the isolated rat heart for the duration of the experiment (data not shown).

### *Effects of TNF- $\alpha$*

To determine whether exogenous TNF- $\alpha$  mimics LPS effects, 10 ng/ml recombinant rat TNF- $\alpha$  (PharMingen, San Diego, CA) was added to the perfusate. In preliminary experiments a significant degree of species specificity was noted: neither human nor murine recombinant TNF- $\alpha$  had a significant impact on contractility of rat hearts, nor did rat TNF- $\alpha$  affect function of isolated rabbit hearts (data not shown).

### *Myocardial Calcium Transients*

Measurement of beat-to-beat intracellular calcium transients was performed as previously described and validated in detail.<sup>26,27</sup> In brief, after 15 min of stabilization, hearts were loaded with the  $\text{Ca}^{2+}$ -sensitive dye Rhod-2 (Molecular Probes) by perfusion with the cell-permeable acetoxymethyl ester (Rhod-2-AM, 0.2 mg/0.1 ml ethanol infused over a period of 2 min at 37°C without recirculation). Dye loading was followed by a 10-min washout period to remove extracellular or unhydrolyzed dye. A

modified spectrofluorometer (SLM-Aminco, Springfield, IL) provided excitation light at 524 nm and recorded emission light at 589 nm. Recordings were performed with a time-resolution of 4 ms for analysis of single free intracellular calcium concentration  $[\text{Ca}^{2+}]_i$  transients and 40 ms for observation of changes in  $[\text{Ca}^{2+}]_i$  over longer time periods. Because Rhod-2 has no spectral shift after  $\text{Ca}^{2+}$  binding, it is necessary to measure differences in dye loading or changes in tissue dye concentration over time (e.g., leakage or photobleaching). To accomplish this, tissue Rhod-2 absorbance was quantified using the ratio of scattered excitation light at 524 nm (peak Rhod-2 absorbance in myocardial tissue) and 589 nm (isosbestic point for myocardium). The change in absorbance over time was used to normalize the calculated intracellular calcium concentration.

To quantify  $[\text{Ca}^{2+}]_i$  at the end of each experiment, 100  $\mu\text{M}$  2,2'-dithiodipyridine (Sigma) was infused over a period of 2 min to induce calcium release from the sarcoplasmic reticulum. This was immediately followed by bolus injection of the calcium ionophore A23187 (10  $\mu\text{M}$  calcimycin; Sigma) in 1 ml calcium solution, 10%, to maximize calcium entry from the extracellular space. These procedures established maximum fluorescence ( $F_{\text{max}}$ ), which was used to calculate systolic and diastolic calcium concentration using the following equation:

$$[\text{Ca}^{2+}]_i = K_d \times (F_t - F_o) / (F_{\text{max}} - F_o) / A_t$$

where  $[\text{Ca}^{2+}]_i$  is the free intracellular calcium concentration,  $K_d$  is the dissociation constant for Rhod-2 with calcium (710 mM in the presence of 0.5 mM myoglobin),  $F_t$  is fluorescence at a specific time point,  $F_o$  is autofluorescence measured before dye loading, and  $A_t$  is tissue light absorbance at a given time point. Interference with Rhod-2 emission and absorption spectra by LPS or any of the inhibitors used was excluded in preliminary experiments. The slope of the systolic calcium upstroke was assessed by calculating the first derivative of the  $[\text{Ca}^{2+}]_i$  transient recording ( $d[\text{Ca}^{2+}]_i/dt$ ). The rate of diastolic  $\text{Ca}^{2+}$  removal ( $\tau[\text{Ca}^{2+}]_i$ ) from the cytosol was assessed by fitting calcium transient data points to a monoexponential function that describes the descending slope of the  $\text{Ca}^{2+}_i$  transient, using the following equation:

$$[\text{Ca}^{2+}]_i(t) = [(\text{Ca}^{2+})_{i\text{max}} - (\text{Ca}^{2+})_{i\text{infin}}] \times \exp(-\tau \text{Ca}^{2+}_i \times t)$$

where  $(\text{Ca}^{2+})_{i\text{max}}$  is  $\text{Ca}^{2+}_i$  at maximum  $d[\text{Ca}^{2+}]_i/dt$ , and  $(\text{Ca}^{2+})_{i\text{infin}}$  is  $[\text{Ca}^{2+}]_i$  extrapolated to infinite time. The  $\tau[\text{Ca}^{2+}]_i$  was calculated using this equation as the calcium transient declined from 90% to 10% of its maximum value.

### *Myofibrillar Calcium Response*

The calcium responsiveness of the contractile apparatus was assessed by plotting left ventricular developed



pressure as a function of systolic  $[Ca^{2+}]_i$ . To manipulate  $[Ca^{2+}]_i$ , the calcium concentration in the perfusate was sequentially varied between 0.5 and 2.5 mM in 0.5-mM increments;  $[Ca^{2+}]_i$  and developed left ventricular pressure were measured at each extracellular calcium concentration. These experiments were performed immediately after the measurement of baseline  $[Ca^{2+}]_i$  after 60 min perfusion with or without LPS.

#### Transmembrane Calcium Flux

To estimate changes in transsarcolemmal  $Ca^{2+}$  influx, the rate of fluorescence quenching by  $Mn^{2+}$  was studied in separate groups of LPS-treated (recirculating perfusion) and control hearts.  $MnCl_2$  was added to phosphate-free perfusion buffer to achieve a final  $Mn^{2+}$  concentration of 0.3 mM. After 60-min perfusion of Rhod-2-loaded hearts, the perfusate was switched to one containing  $Mn^{2+}$  with constant perfusate flow. Rhod-2 calcium transients were completely quenched in all hearts, and the rate of fluorescence decline was determined by fitting the systolic  $[Ca^{2+}]_i$  values to a monoexponential decay function.  $Mn^{2+}$  enters the cardiomyocyte through L-type  $Ca^{2+}$  channels with identical kinetics to calcium; thus, the rate of  $Mn^{2+}$ -induced quenching of Rhod-2 fluorescence can be used to estimate transmembrane calcium influx (given similar perfusate flow, heart rate, and heart size, as were present in these experiments).<sup>28</sup>

#### TNF- $\alpha$ Determination

In another set of experiments, using both recirculating and non-recirculating perfusion with and without LPS, 3 ml coronary effluent was collected every 10 min and the samples snap frozen in liquid nitrogen. Undiluted 50- $\mu$ l samples were assayed for TNF by enzyme-linked sandwich immunoassay (ELISA) (Quantikine M TNF- $\alpha$  kit; R&D Systems). After incubation and preparation according to the manufacturer's instructions, optical density was measured with an automated microplate reader, and the TNF- $\alpha$  concentration was derived from a standard calibration curve using rat TNF- $\alpha$ . To determine the TNF- $\alpha$  content of myocardial tissue, hearts were snap frozen in liquid nitrogen and stored at  $-80^\circ\text{C}$ . Left ventricular tissue was homogenized in ice-cold buffer containing (all from Sigma) 20 mM Tris HCL (pH 7.4), 2 mM EDTA (disodium salt), 0.5 mM EGTA, 1 mM phenylmethylsulfonyl fluoride, 25  $\mu$ g/ml leupeptin, and 0.3 mM sucrose, and centrifuged at 1,000g for 15 min; protein content was determined in the supernatant (diluted 1:5 vol/vol in lysis buffer). Using the Quantikine M TNF- $\alpha$  ELISA kit, 50- $\mu$ l samples of the diluted supernatant were incubated as described above. TNF- $\alpha$  concentration was normalized for protein content, and the TNF- $\alpha$  concentration was expressed as picograms of TNF per gram myocardial wet weight.

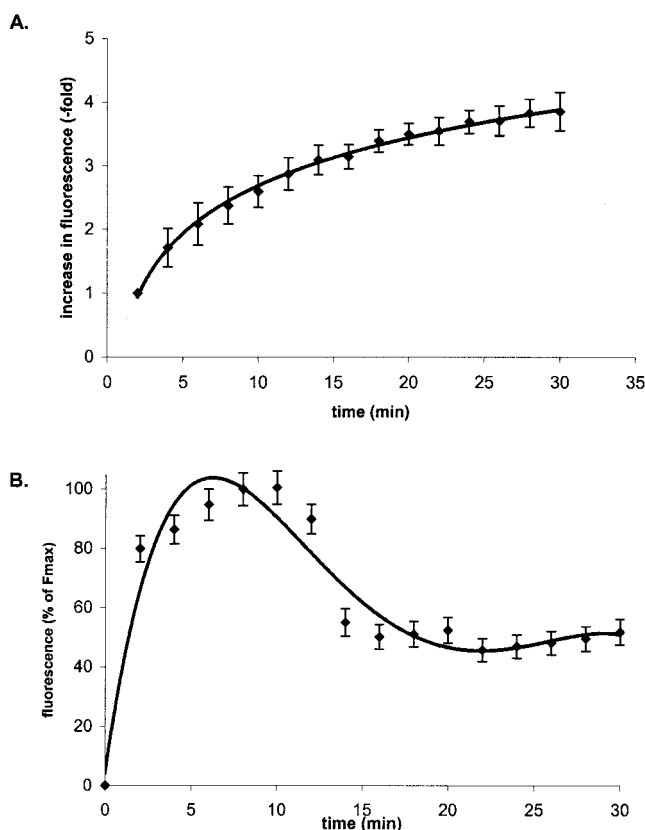

Fig. 1. (A) Time course of uptake of fluorescence-labeled lipopolysaccharide (LPS) in beating rat hearts. Surface fluorescence is recorded at 589 nm using excitation light of 524 nm. Data are expressed as increase in fluorescence light  $\pm$  SD as compared with fluorescence light intensity after 2-min perfusion with Texas Red LPS. Logarithmic regression,  $R^2 = 0.99$ . (B) Intracellular uptake of fluorescent LPS assessed in intact perfused rat hearts. Hearts were perfused for 8.5 min with fluorescent LPS followed by 21.5-min washout with LPS-free perfusate. Values were expressed as a percentage of the peak fluorescence, and the mean values of four experiments were fitted to a polynomial regression ( $R^2 = 0.87$ ). All measurements have been adjusted for background autofluorescence.

#### Statistical Analysis

Analysis of calcium recordings was performed using Sigma Plot software (version 4.0; SPSS Inc., Chicago IL). Data are expressed as mean  $\pm$  SD, and statistical analysis was performed using the SPSS software package (version 9.0; SPSS Inc.). Multiple group comparisons were tested for significance by analysis of variance using the Bonferroni correction for multiple comparisons. If no significant departure from normal distribution was confirmed using the Kolmogorov-Smirnov test ( $P > 0.05$ ), Student  $t$  test was used to compare individual data sets.

## Results

#### LPS Uptake

As depicted in figure 1A, LPS accumulated rapidly in the myocardium. This measurement does not distinguish between LPS localized inside and outside of cells. To

**Fig. 2.** Representative confocal photomicrographs of the left ventricular free wall from a heart perfused with (A) unreacted Texas Red X alone or (B) 5  $\mu\text{g}/\text{mL}$  Texas Red X-labeled lipopolysaccharide (LPS). Each panel shows a 0.5- $\mu\text{m}$  optical section of myocardium perfused with either unreacted fluorophore or Texas Red X-labeled LPS for 30 min. After a 30-min washout period with Krebs-Henseleit buffer, hearts were fixed, paraffin-embedded, sectioned, and used for microscopic analysis. The specific intracellular accumulation of LPS in cardiomyocytes is shown. Scale bars represent 5  $\mu\text{m}$ .

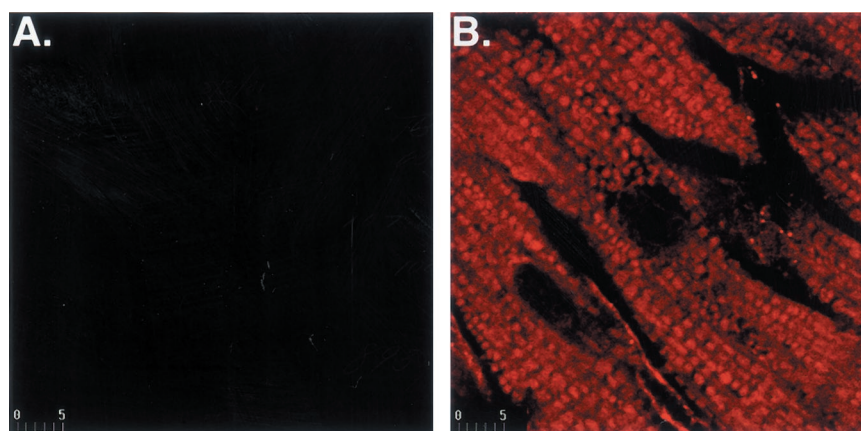

account for fluorescence arising from intravascular LPS, the data are expressed as the increase in fluorescence beyond that present after 2-min perfusion with labeled LPS. To further assess the degree of intracellular LPS uptake, hearts were perfused for 8.5 min with labeled LPS followed by 30-min washout period using LPS-free perfusate (fig. 1B). An initial drop in fluorescent emission is consistent with labeled LPS being washed out from vascular lumen and interstitial space. Then fluorescence intensity remained stable until the end of the perfusion protocol, suggesting that approximately 50% of the Texas Red X-LPS present in the heart is localized within myocardial cells. This notion is supported by results depicted in figure 2, in a tissue section representative of myocardial LPS fluorescence at the end of the washout period. Although our method does not allow for quantification of the absolute tissue concentration of LPS, it is apparent that a large amount of LPS accumulates in the whole heart within several minutes and that significant intracellular concentrations persist after LPS removal.

#### *Effects of LPS on Contractility and Calcium Handling*

Using non-recirculating perfusion of isolated rat hearts perfused with up to 5  $\mu\text{g}/\text{mL}$  LPS, no significant change in myocardial contractility (fig. 3A), oxygen consumption, or intracellular calcium handling was noted. However, with recirculation left ventricular developed pressure began to decline after approximately 20 min, reaching statistical significance after approximately 35 min. After 60 min of recirculating perfusion with LPS, developed pressure was 20–30% lower than in control hearts (fig. 2A). The changes in  $+\text{dp}/\text{dt}$  (the first derivative of the left ventricular developed pressure recording) followed the changes in developed pressure;  $+\text{dp}/\text{dt}$  at 60 min was  $1,358 \pm 314$  mmHg/s in LPS-treated hearts versus  $1,718 \pm 295$  mmHg/s in control hearts ( $P < 0.02$ , analysis of variance). Coronary perfusion pressure increased late during the perfusion period ( $74 \pm 11$  mmHg vs.  $55 \pm 8$  mmHg in control hearts at

60 min;  $P < 0.05$ , Student *t* test). Myocardial oxygen consumption declined in parallel with the change in developed pressure ( $0.68 \pm 0.11$  ml  $\cdot$  min $^{-1}$   $\cdot$  g $^{-1}$  dry weight in LPS-treated hearts vs.  $0.82 \pm 0.09$  ml  $\cdot$  min $^{-1}$   $\cdot$  g $^{-1}$  dry weight in control hearts at 60 min;  $P < 0.05$ , Student *t* test). Perfusion of the heart with 10 ng/ml TNF- $\alpha$  caused changes in developed left ventricular pressure similar to changes with LPS with recirculation, but with faster onset of effect (fig. 3B) (see also Effects of TNF- $\alpha$  on Contractility and Calcium Handling).

Representative calcium transients recorded during recirculating perfusion with LPS are shown in figure 4. Systolic  $[\text{Ca}^{2+}]_i$  decreased in response to LPS with a similar time course as contractility (fig. 5A). In control hearts, systolic  $[\text{Ca}^{2+}]_i$  was  $553 \pm 33$  nM immediately after dye loading and  $537 \pm 43$  nM after 60-min recirculating perfusion. In LPS-treated hearts, systolic  $[\text{Ca}^{2+}]_i$  decreased from  $546 \pm 23$  to  $393 \pm 28$  nM throughout the 60-min recirculation period ( $P < 0.01$ , analysis of variance) (fig. 5A), resulting in a smaller amplitude of the calcium transient. Diastolic  $[\text{Ca}^{2+}]_i$  also declined during the perfusion period in LPS-treated hearts ( $194 \pm 13$  nM at 0 min vs.  $135 \pm 31$  nM at 60-min recirculating LPS perfusion;  $P < 0.05$ , analysis of variance) (fig. 5B). The rate of systolic rise in  $[\text{Ca}^{2+}]_i$  ( $d[\text{Ca}^{2+}]_i/\text{dt}$ ) was significantly slower in LPS-treated hearts (fig. 6A), but the  $\tau[\text{Ca}^{2+}]_i$  did not change (fig. 6B). The rate of fluorescence quenching by  $\text{Mn}^{2+}$  was not different between LPS-treated and control hearts ( $173 \pm 51$  vs.  $191 \pm 48$  ms $^{-1}$ ;  $P = 0.8$ , Student *t* test), indicating that the kinetics of transsarcolemmal  $\text{Ca}^{2+}$  influx via L-type  $\text{Ca}^{2+}$  channels was not substantially altered by LPS exposure.

#### *Myofibrillar Calcium Response*

The calcium responsiveness of the contractile apparatus is characterized by the force generated for a given  $[\text{Ca}^{2+}]_i$ . Hence, we plotted left ventricular developed pressure as a function of the measured  $[\text{Ca}^{2+}]_i$  at varying perfusate  $\text{Ca}^{2+}$  concentrations in control hearts and hearts treated with recirculating LPS (fig. 7). Neither the

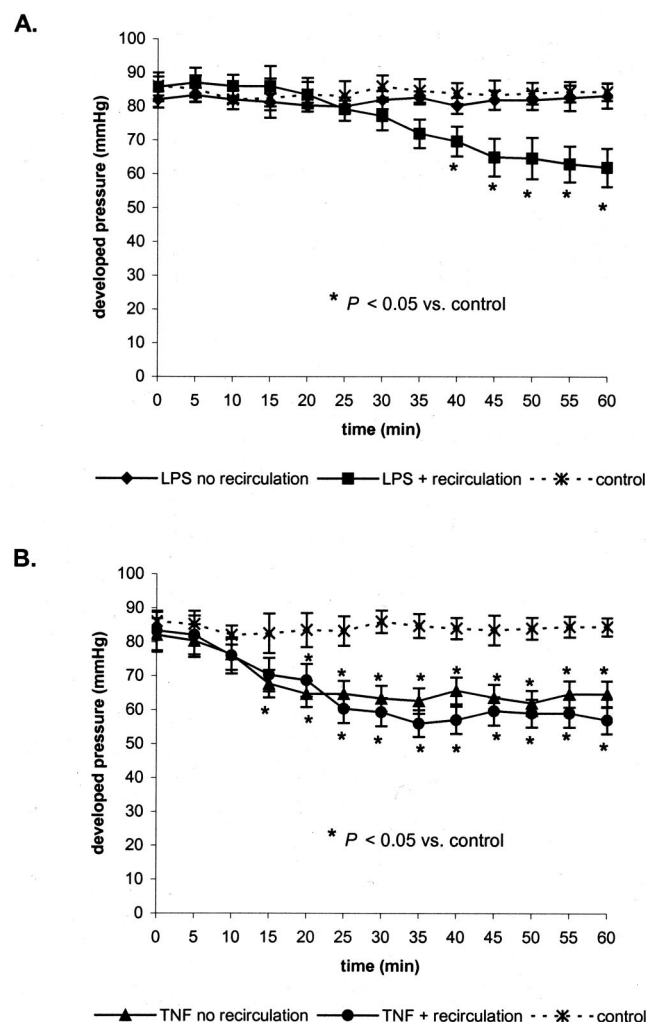

Fig. 3. Effects of (A) 5  $\mu\text{g/ml}$  lipopolysaccharide (LPS) and (B) 10 ng/ml recombinant rat tumor necrosis factor (TNF) $\alpha$  on left ventricular developed pressure in isolated rat hearts subjected to non-recirculating and recirculating perfusion. Each data point represents the mean  $\pm$  SD of six experiments. Groups were compared with one-way analysis of variance using the Bonferroni correction.

position nor the slope of the calcium-force relation was altered in LPS-treated hearts, indicating that the calcium responsiveness of the contractile apparatus is not changed during short-term LPS exposure in the *in vitro* rat heart.

#### TNF- $\alpha$ Expression in LPS-treated Hearts

In recirculating perfusate, TNF- $\alpha$  was first detected after 20-min perfusion with LPS (fig. 8). The concentration in the perfusate increased progressively to reach  $165 \pm 48$  pg/ml at 60 min. In left ventricular tissue, the TNF- $\alpha$  concentration after 60-min perfusion with LPS was  $511 \pm 304$  pg/g wet weight, as compared with  $5.7 \pm 2.3$  pg/g wet weight in control hearts ( $P < 0.01$ , Student *t* test). For comparison, the myocardial tissue concentration of TNF- $\alpha$  in hearts perfused with exoge-

nous TNF- $\alpha$  was  $702 \pm 114$  pg/g wet weight after 60-min perfusion and 2-min washout.

#### Effects of TNF- $\alpha$ on Contractility and Calcium Handling

In hearts perfused with buffer containing 10 ng/ml recombinant rat TNF- $\alpha$ , left ventricular developed pressure started to decrease after 10 min with both recirculating and non-recirculating perfusion, reaching a statistically significant difference after 20 min (fig. 3B). The effects on developed pressure and dp/dt were slightly more pronounced with recirculating perfusion, with a developed pressure at 60 min of  $64 \pm 11$  mmHg with non-recirculating TNF- $\alpha$  compared with  $57 \pm 7$  mmHg with recirculating TNF- $\alpha$  ( $P = 0.04$ , analysis of variance). Myocardial oxygen consumption decreased proportionately to the depression of left ventricular developed pressure (data not shown). The

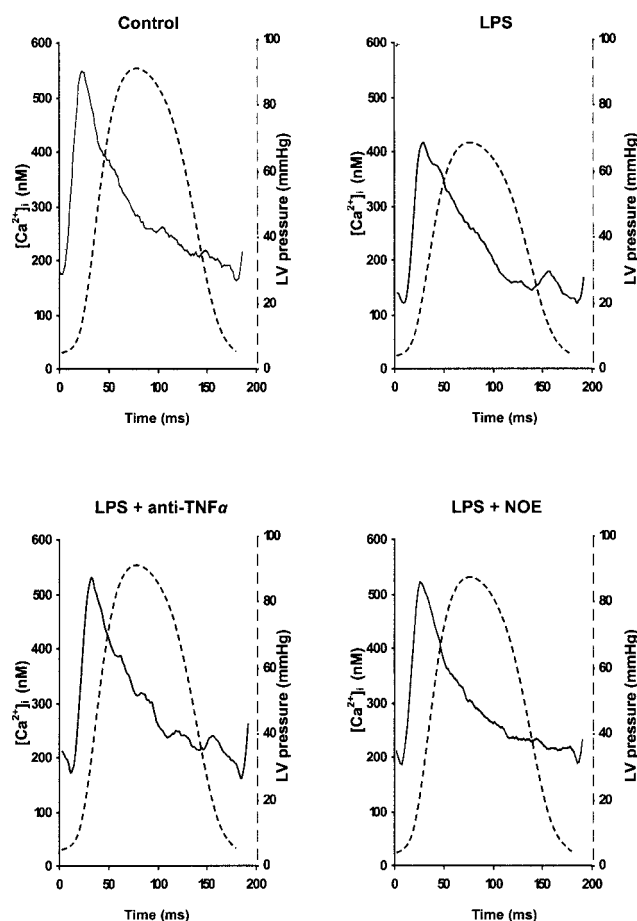

Fig. 4. Representative calcium transients and left ventricular pressure recordings from a rat heart perfused with 5  $\mu\text{g/ml}$  lipopolysaccharide (LPS) in recirculating perfusion mode at the onset of LPS perfusion (control) and after 60-min LPS perfusion (LPS). LPS + anti-tumor necrosis factor  $\alpha$  (anti-TNF- $\alpha$ ) = LPS-perfused heart with 0.3  $\mu\text{g/ml}$  neutralizing anti-TNF- $\alpha$  added to the recirculating perfusate. LPS + N-oleoylethanolamine (NOE) = LPS-perfused heart with 1  $\mu\text{M}$  of the ceramidase inhibitor NOE added to the recirculating perfusate. Solid line and left-side y-axis = intracellular calcium; interrupted line and right-side y-axis = left ventricular pressure.



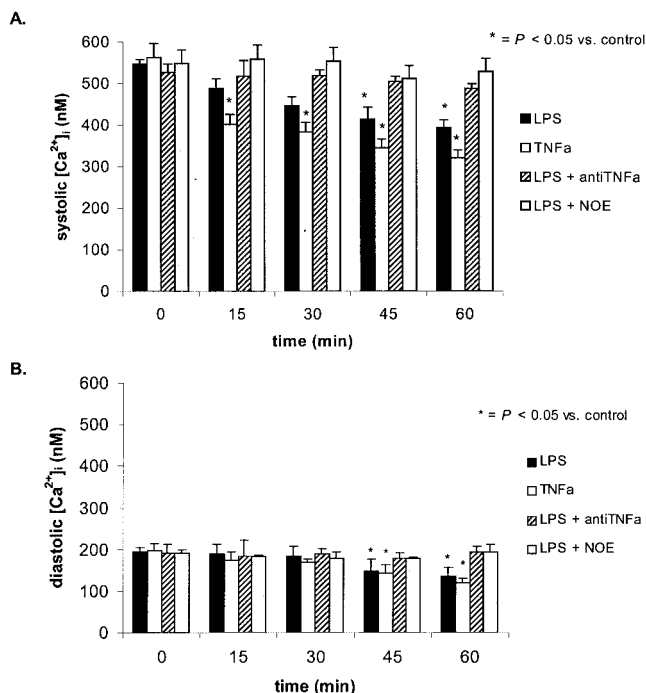

**Fig. 5.** Effects of lipopolysaccharide (LPS) and recombinant rat tumor necrosis factor (TNF) $\alpha$  on (A) systolic and (B) diastolic intracellular calcium levels of isolated rat hearts subjected to recirculating perfusion. Concomitant administration of 0.3  $\mu$ g/ml anti-rat TNF- $\alpha$  and 1  $\mu$ M N-oleoylethanolamine inhibited the LPS-induced decline of intracellular free calcium concentration ( $[Ca^{2+}]_i$ ). Each data point represents the mean  $\pm$  SD of six experiments. Groups were compared with one-way analysis of variance using the Bonferroni correction.

changes induced by exogenous TNF in intracellular calcium handling paralleled the time course of the decline in myocardial contractility, with an early decrease of systolic  $[Ca^{2+}]_i$  (fig. 5A), together with a reduced rate of rise of the calcium transient (fig. 6A), followed by a decrease of diastolic  $[Ca^{2+}]_i$  (fig. 5B). In summary, exogenous TNF- $\alpha$  mimicked the functional effects of LPS but occurred more quickly.

#### Role of TNF Signaling in LPS Effects

Administration of anti-rat 0.3  $\mu$ g/ml TNF- $\alpha$  antibody significantly attenuated the effects of recirculating LPS on contractility and intracellular calcium handling. In the presence of anti-rat TNF- $\alpha$  antibody, we noted only a slight decline in developed pressure at the end of the perfusion period (fig. 9); systolic  $[Ca^{2+}]_i$ , as well as  $d[Ca^{2+}]_i/dt$ , remained unchanged throughout (figs. 5 and 6). Furthermore, coronary perfusion pressure was not different from control ( $59 \pm 11$  vs.  $55 \pm 9$  mmHg;  $P = 0.9$ , Student *t* test). Pretreatment with the ceramide (a key intermediate in the sphingomyelinase signaling pathway) inhibitor NOE also effectively inhibited the effects of LPS on contractility and calcium handling. After NOE administration, developed pressure, systolic  $[Ca^{2+}]_i$ , diastolic  $[Ca^{2+}]_i$ , and  $d[Ca^{2+}]_i/dt$  did not significantly change throughout the experiment (figs. 4–6).

Coronary perfusion pressure was not different from control at 60 min in the presence of NOE.

## Discussion

The mechanism of septic cardiodepression remains controversial. In the present study, LPS-induced dysfunction occurred only with recirculation of the perfusate, suggesting that the accumulation of one or more substances in response to LPS was necessary. A prominent causative role for the stimulation of myocardial TNF production by LPS was indicated by the findings that (1) LPS induced rapid TNF production within the myocardium and release into the coronary circulation, (2) eliminating TNF- $\alpha$  signaling directly by using neutralizing anti-TNF- $\alpha$  effectively inhibited the effects of LPS on contractility and calcium cycling, (3) administration of exogenous rrTNF- $\alpha$  mimicked LPS effects on calcium handling and contractility but with faster onset, and (4) inhibition of sphingosine production with the ceramide inhibitor NOE also prevented the development of short-term LPS effects in the heart. The current study is the first to link LPS-stimulated myocardial TNF- $\alpha$  production and impaired calcium cycling with contractile dysfunction in intact hearts.

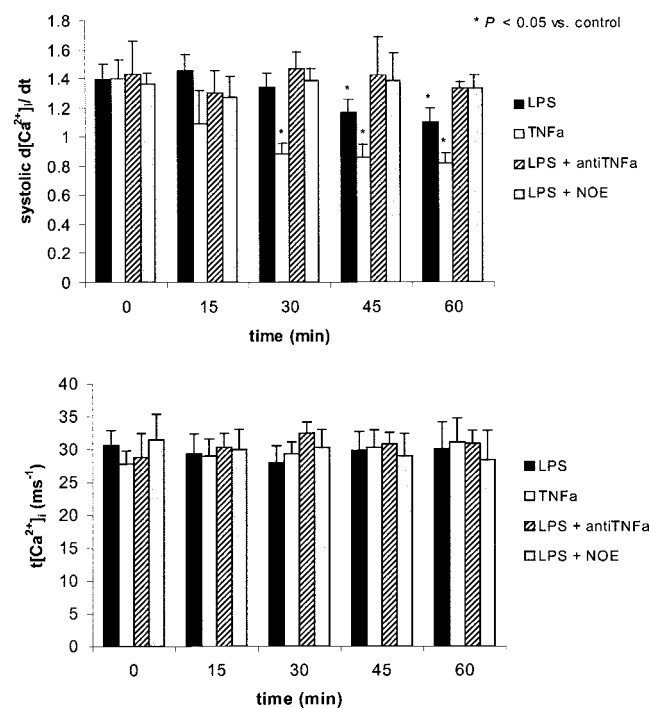

**Fig. 6.** Effects of lipopolysaccharide (LPS) and recombinant rat tumor necrosis factor (TNF) $\alpha$  on (A) systolic first derivative of the  $[Ca^{2+}]_i$  transient recording ( $d[Ca^{2+}]_i/dt$ ) and (B) rate of diastolic calcium decline ( $\tau[Ca^{2+}]_i$ ) in isolated rat hearts subjected to recirculating perfusion. Concomitant administration of 0.3  $\mu$ g/ml anti-rat TNF- $\alpha$  and 1  $\mu$ M N-oleoylethanolamine inhibited the LPS-induced reduction of the  $d[Ca^{2+}]_i/dt$ . Each data point represents the mean  $\pm$  SD of six experiments. Groups were compared with one-way analysis of variance using the Bonferroni correction.

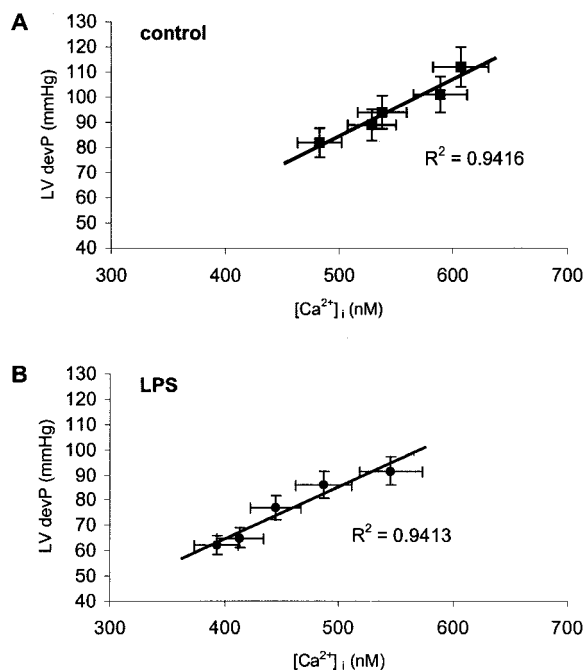

Fig. 7. Left ventricular developed pressure as a function of free intracellular calcium concentration ( $[Ca^{2+}]_i$ ). The slope of the calcium-force relation is not different (control = 0.225 x; LPS = 0.201 x), indicating that the calcium responsiveness of the contractile apparatus is unchanged. LV devP = left ventricular developed pressure.

#### LPS and Cardiac TNF- $\alpha$ Expression

Myocardial TNF- $\alpha$  expression has been identified in endothelial cells, smooth muscle cells, and cardiomyocytes.<sup>8</sup> Production of TNF by the cardiomyocyte, as well as other myocardial cell types, has been demonstrated recently in response to injuries such as ischemia-reperfusion and pressure overload.<sup>29,30</sup> Intramyocardial production of TNF- $\alpha$  in response to LPS has also been demonstrated previously, but the functional consequences and mechanisms of TNF effect on function were unclear.<sup>7,8,31</sup> Production of TNF- $\alpha$  by isolated neo-

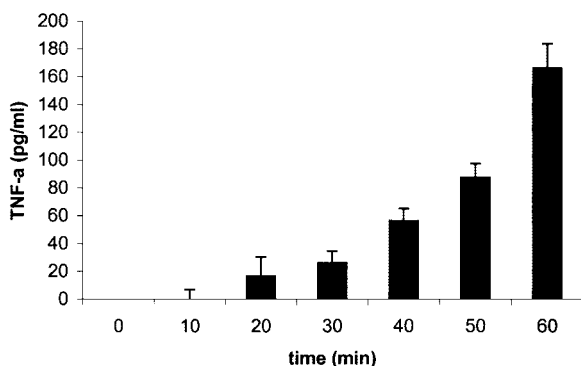

Fig. 8. Tumor necrosis factor  $\alpha$  (TNF- $\alpha$ ) concentration in recirculating coronary effluent of rat hearts perfused with crystalloid solution containing 5  $\mu$ g/ml lipopolysaccharide (LPS). The TNF- $\alpha$  concentration in myocardial tissue after 60-min perfusion was  $511 \pm 304$  pg/g wet weight in LPS-treated hearts and  $5.7 \pm 2.3$  pg/g wet weight in control hearts.

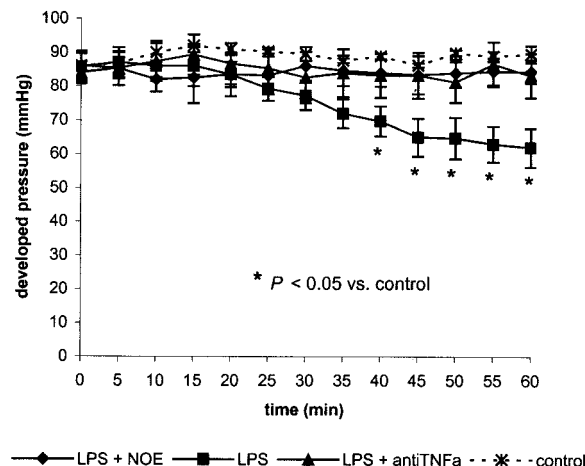

Fig. 9. Inhibition of LPS-induced decrease in left ventricular developed pressure in isolated rat hearts subjected to recirculating perfusion. Lipopolysaccharide (LPS) concentration was 5  $\mu$ g/ml; 0.3  $\mu$ g/ml anti-rat tumor necrosis factor  $\alpha$  was added to the perfusate together with LPS; 1  $\mu$ M N-oleoylethanolamine was administered 20 min before LPS perfusion. Each data point represents the mean  $\pm$  SD of six experiments. Groups were compared with one-way analysis of variance using the Bonferroni correction.

natal and adult cardiac myocytes was associated with depressed contractility and apoptosis.<sup>7</sup> The sarcolemmal TNF- $\alpha$  receptor, TNFR-1, has been identified in rat cardiomyocytes and linked with changes in intracellular calcium handling.<sup>32</sup> Our data clearly demonstrate that LPS is efficiently taken up by the isolated rat heart, leading to rapid stimulation of myocardial TNF- $\alpha$  production. The demonstration of myocellular LPS uptake is important, for we have recently shown that the physical process of LPS internalization in the cardiomyocyte may be critical for initiating subsequent LPS-stimulated signal events.<sup>25</sup>

#### LPS, TNF, and Excitation-contraction Coupling

The effects of LPS on myocardial contractility and calcium handling are controversial. Several groups, including our own, have recently shown that LPS leads to increased calcium cycling and/or reduced myofilament calcium responsiveness,<sup>11,13,27,33,34</sup> whereas other authors have found no change in myofilament  $Ca^{2+}$  sensitivity<sup>35</sup> and either no change or reduced calcium transients and transmembrane calcium flux.<sup>11,34-36</sup> There are numerous possible explanations for these differences, including species, experimental preparation, and duration of LPS exposure. Changes in intracellular calcium handling and myocardial contractility that become prominent several hours after LPS or TNF administration *in vivo* or *in vitro* are probably due, at least in part, to a NO-mediated increase in cyclic guanosine monophosphate and appear to be fundamentally different from early, NO-independent changes.<sup>9,23,27</sup>

Similar conflict can be found regarding the effects of TNF, although the bulk of reports support a significant



role for TNF in altering myocardial contractility, calcium handling, and energetics.<sup>6,9,10,14,23,37</sup> In the present study, we noted rapid LPS-induced changes in myocardial calcium handling that included a decline in systolic  $[Ca^{2+}]_i$ , reduced amplitude calcium transients, and slower rate of rise of systolic  $[Ca^{2+}]_i$ ; the rate of diastolic  $[Ca^{2+}]_i$  removal was unchanged. In contrast to later effects,<sup>27</sup> myofibrillar calcium responsiveness was unchanged. These short-term changes in calcium handling were associated with a similarly rapid depression of myocardial contractility, were completely prevented by neutralization of TNF- $\alpha$  protein or signal transduction, and were mimicked by exogenous recombinant rat TNF- $\alpha$ . Negative inotropic effects of TNF- $\alpha$  have recently been characterized in other experimental models, including transgenic mice overexpressing TNF- $\alpha$ <sup>38</sup> and exogenous TNF- $\alpha$  given to isolated perfused hearts.<sup>17</sup> In isolated cardiac myocytes, TNF caused a rapid decrease in peak  $[Ca^{2+}]_i$  without a change in inward calcium current.<sup>19,20</sup>

In adult cardiac myocytes, the amplitude of the calcium transient and, hence, the systolic intracellular calcium level are primarily determined by the amount of calcium released from the sarcoplasmic reticulum *via* the calcium release channel (ryanodine receptor). The explanation for reduced contractility resulting from LPS-induced myocardial TNF production is suggested by the observation that LPS-induced changes in calcium handling and contractility were prevented by inhibiting sphingosine production. TNF- $\alpha$  binding to membrane TNF receptors activates sphingomyelinase, which catalyzes the production of ceramide from membrane sphingomyelin. Sphingosine is then cleaved from sphingomyelin by the enzyme ceramidase.<sup>39</sup> There is currently substantial evidence that sphingosine directly inhibits calcium release by the sarcoplasmic reticulum.<sup>40-43</sup> Other evidence in support of this notion includes work showing reduced calcium release and altered ryanodine receptor function in sarcoplasmic reticulum isolated from endotoxemic dogs.<sup>44,45</sup> Sarcoplasmic reticulum calcium release is closely coupled to sarcolemmal calcium influx during the action potential *via* L-type calcium channels (calcium-induced calcium release), so inhibition of the L-type calcium channel can also result in a reduced amplitude of the calcium transients. TNF- $\alpha$  and sphingosine can reduce L-type channel calcium current in isolated cells.<sup>20,32,42</sup> We attempted to assess the role of reduced sarcolemmal calcium influx to reduced systolic calcium levels by measuring the manganese quenching rate of calcium-induced fluorescence of Rhod-2. In this model, we could not demonstrate reduced calcium influx through cell membrane calcium channels in response to LPS or TNF. These findings point to the ryanodine receptor as the primary cause for reduced  $Ca^{2+}$  transient amplitude and, consequently, reduced contractile function. However, it is important to

note that the  $Mn^{2+}$  quenching rate is a somewhat insensitive measure that may underestimate actual changes in sarcolemmal calcium influx during the cardiac action potential.

LPS stimulation can result in the production of numerous mediators in addition to TNF that have been shown to affect cardiac function and cardiomyocyte survival, including interleukin-1, platelet activating factor, nitric oxide, and various prostanoids.<sup>9,10,12,20,46,47</sup> In contrast to the present study, LPS has been shown to cause rapid coronary vasodilation (perhaps in conjunction with the production of an unidentified protein) in a pharmacologically preconstricted coronary circulation.<sup>47</sup> It is also important to point out that sphingolipid metabolites are central to a number of signal transduction pathways. For example, they can mediate mitogenic or apoptotic effects depending on cell type, initiating stimulus, and the context in which they are produced. Ceramide, in particular, has been viewed as a central regulator of cell cycle status, apoptosis, and cell senescence, whereas a ceramide metabolite, sphingosine-1-phosphate, may be mitogenic and protect from ceramide accumulation and apoptosis.<sup>48</sup> Thus, promoting ceramide accumulation, as would be expected to occur from ceramidase inhibition by NOE, might have significant long-term effects that were not assessed by the present experiments.

These experiments demonstrate that LPS causes acute depression of left ventricular contractility and intracellular calcium handling in intact heart. These effects require rapid myocardial TNF- $\alpha$  production and are mediated *via* the sphingomyelin-sphingosine signaling cascade. The pathophysiologic role of innate and adaptive immune responses triggered in myocardial cells in response to injuries such as ischemia-reperfusion, abnormal hemodynamic loads, and heart failure is receiving increasing attention. Strategies to neutralize the biologic activity of TNF- $\alpha$  and other inflammatory mediators are currently in development<sup>49,50</sup> and may prove useful to limit cardiovascular dysfunction, both in the short term for sepsis and in more chronic disorders.

## References

1. Wheeler AP, Bernard GR: Treating patients with severe sepsis. *N Engl J Med* 1999; 340:207-14
2. Parker MM, Shelhammer JH, Bacharach SL, Green MV, Natanson C, Frederick TM, Damske BA, Parillo JE: Profound but reversible myocardial depression in patients with septic shock. *Ann Intern Med* 1984; 100:483-90
3. Parker JL, Adams HR: Development of myocardial dysfunction in endotoxin shock. *Am J Physiol* 1985; 248:H818-26
4. Hung J, Lew WY: Temporal sequence of endotoxin-induced systolic and diastolic myocardial depression in rabbits. *Am J Physiol* 1993; 265:H810-19
5. Rubin LJ, Keller RS, Parker JL, Adams HR: Contractile dysfunction of ventricular myocytes isolated from endotoxemic guinea pigs. *Shock* 1994; 2:113-20
6. Tracey KJ, Fong Y, Hesse DG, Manogue KR, Lee AT, Kuo GC, Lowry SF, Cerami A: Anti-cachectin/TNF monoclonal antibodies prevent septic shock during lethal bacteremia. *Nature* 1987; 330:662-4
7. Comstock KL, Krown KA, Page TM, Martin D, Ho P, Pedraza M, Castro EN, Nakajima N, Glembotski CC, Quintana PJE, Sabbadini RA: LPS-induced TNF- $\alpha$  release from and apoptosis in rat cardiomyocytes: Obligatory role for CD14 in mediating the LPS response. *J Mol Cell Cardiol* 1998; 30:2761-75

8. Kapadia S, Lee J, Torre-Amione G, Birsall HH, Ma TS, Mann DL: Tumor necrosis factor- $\alpha$  gene and protein expression in adult feline myocardium after endotoxin administration. *J Clin Invest* 1995; 96:1042-52
9. Luss H, Watkins SC, Freeswick PD, Imro AK, Nussler AK, Billiar TR, Simmons RL, del Nido PJ, McGowan FX: Characterization of inducible nitric oxide synthase expression in endotoxemic rat cardiac myocytes *in vivo* and following cytokine exposure *in vitro*. *J Mol Cell Cardiol* 1995; 27:2015-29
10. Kumar A, Thota V, Dee L, Olson J, Uretz E, Parrillo JE: Tumor necrosis factor alpha and interleukin 1beta are responsible for *in vitro* myocardial cell depression induced by human septic shock serum. *J Exp Med* 1996; 183:949-58
11. Yasuda S, Lew WYW: Lipopolysaccharide depresses cardiac contractility and  $\beta$ -adrenergic contractile response by decreasing myofilament response to calcium in cardiac myocytes. *Circ Res* 1997; 81:1011-20
12. Stein B, Frank P, Schmitz W, Scholz H, Thoenes M: Endotoxin and cytokines induce direct cardiodepressive effects in mammalian cardiomyocytes via induction of nitric oxide synthase. *J Mol Cell Cardiol* 1996; 28:1631-9
13. Starr RG, Lader AS, Phillips GC, Stroman CE, Abel FL: Direct action of endotoxin on cardiac muscle. *Shock* 1995; 3:380-4
14. Nishikawa Y, Lew WYW: Serum tumor necrosis factor- $\alpha$  does not mediate endotoxin-induced myocardial depression. *Am J Physiol* 1996; 39:H485-91
15. Meng X, Ao L, Meldrum DR, Cain BS, Shames BD, Selzman CH, Banerjee A, Harken AH: TNF- $\alpha$  and myocardial depression in endotoxemic rats: Temporal discordance of an obligatory relationship. *Am J Physiol* 1998; 275:R502-8
16. Meldrum DR, Meng X, Dinarello CA, Ayala A, Cain BS, Shames BD, Ao L, Banerjee A, Harken AH: Human myocardial tissue TNF- $\alpha$  expression following acute global ischemia *in vivo*. *J Mol Cell Cardiol* 1998; 30:1683-9
17. Edmunds NJ, Lal H, Woodward B: Effects of tumor necrosis factor- $\alpha$  on left ventricular function in the rat isolated perfused heart: Possible mechanism for a decline in cardiac function. *Br J Pharmacol* 1999; 126:189-96
18. Oral H, Dorn GW, Mann DL: Sphingosine mediates the immediate negative inotropic effects of tumor necrosis factor- $\alpha$  in the adult mammalian cardiac myocyte. *J Biol Chem* 1997; 272:4836-42
19. Yokoyama T, Vaca L, Rossen RD, Durante W, Hazarika P, Mann DL: Cellular basis for the negative inotropic effects of tumor necrosis factor- $\alpha$  in the adult mammalian heart. *J Clin Invest* 1993; 92:2303-12
20. Sugishita K, Kinugawa K, Shimizu T, Harada K, Matsui H, Takahashi T, Serizawa T, Kohmoto O: Cellular basis for the acute inhibitory effects of IL-6 and TNF- $\alpha$  on excitation-contraction coupling. *J Mol Cell Cardiol* 1999; 31:1457-67
21. Murray DR, Freeman GL: Tumor necrosis factor- $\alpha$  induces a biphasic effect on myocardial contractility in conscious dogs. *Circ Res* 1996; 78:154-60
22. Muller-Werdan U, Schumann H, Loppnow H, Fuchs R, Darmer D, Stadler J, Holtz J, Werdan K: Endotoxin and tumor necrosis factor alpha exert a similar proinflammatory effect in neonatal rat cardiomyocytes, but have different cardiodepressant profiles. *J Mol Cell Cardiol* 1998; 30:1027-36
23. Muller-Werdan U, Schumann H, Fuchs R, Reithmann C, Loppnow H, Koch S, Zinny-Arnoldt U, He C, Darmer D, Jungblut P, Stadler J, Holtz J, Werdan K: Tumor necrosis factor alpha is cardiodepressant in pathophysiologically relevant concentrations without inducing inducible nitric oxide synthase or triggering serious cytotoxicity. *J Mol Cell Cardiol* 1997; 29:2915-23
24. Goldhaber JJ, Kim KH, Natterson PD, Lawrence T, Yang P, Weiss JN: Effects of TNF- $\alpha$  on contractility in isolated adult rabbit ventricular myocytes. *Am J Physiol* 1996; 40:H1449-55
25. Cowan DB, Noria S, Stamm C, Garcia LM, Pouitas DN, del Nido PJ, McGowan FX: Lipopolysaccharide internalization activates endotoxin-dependent gene expression in cardiomyocytes. *Circ Res* 2001; 88:491-8
26. del Nido PJ, Glynn P, Buenaventura P, Salama G, Koretsky AP: Fluorescence measurement of calcium transients in perfused rabbit heart using rhod 2. *Am J Physiol* 1998; 274: H728-41
27. Takeuchi K, del Nido PJ, Ibrahim AE, Pouitas DN, Glynn P, Cao-Danh H, Cowan DB, McGowan FX: Increased myocardial calcium cycling and reduced myofilament calcium sensitivity in early endotoxemia. *Surgery* 1999; 126:231-8
28. Merritt JE, Jacob R, Hallam TJ: Use of manganese to discriminate between calcium influx and mobilization from internal stores in stimulated human neutrophils. *J Biol Chem* 1989; 264:1522-7
29. Frangogiannis NG, Lindsey ML, Michael LH, Youker KA, Bressler RB, Mendoza LH, Spengler RN, Smith CW, Entman ML: Resident cardiac mast cells degranulate and release preformed TNF- $\alpha$ , initiating the cytokine cascade in myocardial ischemia/reperfusion. *Circulation* 1998; 98:699-710
30. Kurrelmeyer KM, Michael LH, Baumgarten G, Taffet GE, Peschon JJ, Sivasubramanian N, Entman ML, Mann DL: Endogenous tumor necrosis factor alpha protects the adult cardiomyocyte against ischemic-induced apoptosis in a murine model of acute myocardial infarction. *Proc Natl Acad Sci U S A* 2000; 97: 5456-61
31. Giroir BP, Johnson JH, Brown T, Allen GL, Beutler B: The tissue distribution of tumor necrosis factor biosynthesis during endotoxemia. *J Clin Invest* 1992; 90:693-8
32. Krown KA, Yasui K, Brooker MJ, Dubin AE, Nguyen C, Harris GL, McDonough PM, Glembofski CC, Palade PT, Sabbadini RA: TNF- $\alpha$  receptor expression in rat cardiac myocytes: TNF- $\alpha$  inhibition of L-type  $\text{Ca}^{2+}$  current and  $\text{Ca}^{2+}$  transients. *FEBS Lett* 1995; 376:24-30
33. Tavernier B, Garrigue D, Boule C, Vallet B, Adnet P: Myofilament calcium sensitivity is decreased in skinned cardiac fibres of endotoxin-treated rabbits. *Cardiovasc Res* 1998; 38:472-9
34. Zhong J, Hwang TC, Adams HR, Rubin LJ: Reduced L-type calcium current in ventricular myocytes from endotoxemic guinea pigs. *Am J Physiol* 1997; 42:H2312-24
35. Rigby SL, Hofmann PA, Zhong J, Adams HR, Rubin LJ: Endotoxemia-induced myocardial dysfunction is not associated with changes in myofibrillar  $\text{Ca}^{2+}$  responsiveness. *Am J Physiol* 1998; 43:H580-90
36. Zhong J, Adams HR, Rubin LJ: Cytosolic  $\text{Ca}^{2+}$  concentration and contraction-relaxation properties of ventricular myocytes from *Escherichia coli* endotoxemic guinea pigs: Effect of fluid resuscitation. *Shock* 1997; 7:383-8
37. Bick RJ, Wood DE, Poindexter B, McMillin JB, Karoly A, Wang D, Bunting R, McCann T, Law GJ, Buja LM: Cytokines increase neonatal cardiac myocyte calcium concentrations: the involvement of nitric oxide and cyclic nucleotides. *J Interferon Cytokine Res* 1999; 19:645-53
38. Bryant D, Becker L, Richardson J, Shelton J, Franco F, Peshock R, Thompson M, Giroir B: Cardiac failure in transgenic mice with myocardial expression of tumor necrosis factor- $\alpha$ . *Circulation* 1998; 97:1375-81
39. Wiegmann K, Schulze S, Kampen E, Himmler A, Machleidt T, Kronke M: Human 55-kDa receptor for tumor necrosis factor coupled to signal transduction cascades. *J Biol Chem* 1992; 267:17997-8001
40. Sabbadini RA, Betto R, Teresi A, Fachechi-Cassano G, Salviati G: The effects of sphingosine on sarcoplasmic reticulum membrane calcium release. *J Biol Chem* 1992; 267:15475-84
41. Dettbarn CA, Betto R, Salviati G, Palade P, Jenkins GM, Sabbadini RA: Modulation of cardiac sarcoplasmic reticulum ryanodine receptor by sphingosine. *J Mol Cell Cardiol* 1994; 26:229-42
42. McDonough PM, Yasui K, Betto R, Salviati G, Glembofski CC, Palade PT, Sabbadini RA: Control of Cardiac  $\text{Ca}^{2+}$  levels: Inhibitory actions of sphingosine on  $\text{Ca}^{2+}$  transients and L-type  $\text{Ca}^{2+}$  channel conductance. *Circ Res* 1994; 75: 981-9
43. Webster RJ, Sabbadini RA, Dettbarn CA, Paolini PJ: Sphingosine effects on the contractile behavior of skinned cardiac myocytes. *J Mol Cell Cardiol* 1994; 26:1273-90
44. Liu MS, Wu LL: Reduction of the  $\text{Ca}^{2+}$  induced  $\text{Ca}^{2+}$  release from canine cardiac sarcoplasmic reticulum following endotoxin administration. *Biochem Biophys Res Commun* 1991; 174:1248-54
45. Wu LL, Liu MS: Altered ryanodine receptor of canine cardiac sarcoplasmic reticulum and its underlying mechanism in endotoxin shock. *J Surg Res* 1992; 53:82-90
46. Mickelson JK, Simpson PJ, Lucchesia BR: Myocardial dysfunction and coronary vasoconstriction induced by platelet-activating factor in the post-infarcted rabbit isolated heart. *J Mol Cell Cardiol* 1988; 20:547-61
47. Canon TR, Mann GE, Baydoun AR: Mechanisms of acute vasodilator response to bacterial lipopolysaccharide in the rat coronary microcirculation. *Br J Pharmacol* 1998; 123:637-44
48. Hannun YA: Functions of ceramide in coordinating cellular responses to stress. *Science* 1996; 274:1855-9
49. Kapadia S, Torre-Amione G, Yokoyama T, Mann DL: Soluble TNF binding proteins modulate the negative inotropic properties of TNF- $\alpha$  *in vitro*. *Am J Physiol* 1995; 37:H517-25
50. Deswal A, Bozkurt B, Seta Y, Pariltil-Eiswirth S, Hayes FA, Bloesch C, Mann DL: Safety and efficacy of soluble P75 tumor necrosis factor receptor (Enbrel, Etanercept) in patients with advanced heart failure. *Circulation* 1999; 99:3224-6
